# Supplementary material for: Using Hormone Data and Age to Pinpoint Cycle Day within the Menstrual Cycle
Source: MDPI journal article supplement (doi:10.3390/medicina59071348), 2023-07-23
Supplement: s1 [file s1]

## Supplementary Materials

| Age Range<br>(years) | BMI<br>(lb/in <sup>2</sup> ) | Total Cycles Monitored | Race                      | n   |
|----------------------|------------------------------|------------------------|---------------------------|-----|
| 25-29                | 26.14                        | 624                    | White                     | 180 |
|                      |                              |                        | Asian                     | 20  |
|                      |                              |                        | Black or African American | 13  |
|                      |                              |                        | Other                     | 18  |
| 30-34                | 24.43                        | 1766                   | White                     | 450 |
|                      |                              |                        | Asian                     | 36  |
|                      |                              |                        | Black or African American | 16  |
|                      |                              |                        | Other                     | 43  |
| 35-39                | 27.21                        | 1266                   | White                     | 253 |
|                      |                              |                        | Asian                     | 33  |
|                      |                              |                        | Black or African American | 13  |
|                      |                              |                        | Other                     | 46  |
| 40-44                | 25.18                        | 467                    | White                     | 78  |
|                      |                              |                        | Asian                     | 12  |
|                      |                              |                        | Black or African American | 12  |
|                      |                              |                        | Other                     | 10  |

**Supplementary Table S1: Demographic data of Oova users included in the study.** Age and race data were self-reported, as were weight and height, which were used to calculate BMI.

| Age Range<br>(years) | n<br>(Follicular Phase) | n<br>(Luteal Phase) | p-value                |
|----------------------|-------------------------|---------------------|------------------------|
| 25-29                | 211                     | 276                 | $1.63 \times 10^{-23}$ |
| 30-34                | 772                     | 1031                | $4.18 \times 10^{-40}$ |
| 35-39                | 557                     | 739                 | $3.89 \times 10^{-9}$  |
| 40-44                | 203                     | 272                 | $3.52 \times 10^{-3}$  |

**Supplementary Table S2: Significance results for cycle phase lengths between age groups.** Results from the t-test highlight the significance between follicular and luteal phase lengths in each age group.

| Follicular Phase Length |                        |                    |                    |                      |
|-------------------------|------------------------|--------------------|--------------------|----------------------|
| Age Range 1<br>(years)  | Age Range 2<br>(years) | n<br>(Age Range 1) | n<br>(Age Range 2) | P-value              |
| 25-29                   | 30-34                  | 211                | 722                | $2.9 \times 10^{-2}$ |
| 25-29                   | 35-39                  | 211                | 557                | $4.3 \times 10^{-6}$ |
| 25-29                   | 40-44                  | 211                | 203                | $1.5 \times 10^{-8}$ |
| 30-34                   | 35-39                  | 722                | 557                | $8.6 \times 10^{-5}$ |
| 30-34                   | 40-44                  | 722                | 203                | $3.1 \times 10^{-7}$ |
| 35-39                   | 40-44                  | 557                | 203                | $1.7 \times 10^{-2}$ |

**Supplementary Table S3: Pairwise comparison of follicular phase length between age groups.** Two-sided t-tests were performed to assess the significance of differences in follicular phase length across all age groups. The associated p-values are presented.

| Luteal Phase Length    |                        |                    |                    |                      |
|------------------------|------------------------|--------------------|--------------------|----------------------|
| Age Range 1<br>(years) | Age Range 2<br>(years) | n<br>(Age Range 1) | n<br>(Age Range 2) | P-value              |
| 25-29                  | 30-34                  | 276                | 1031               | $4.7 \times 10^{-2}$ |
| 25-29                  | 35-39                  | 276                | 739                | $2.6 \times 10^{-4}$ |
| 25-29                  | 40-44                  | 276                | 272                | $3.2 \times 10^{-2}$ |
| 30-34                  | 35-39                  | 1031               | 739                | $1.5 \times 10^{-2}$ |
| 30-34                  | 40-44                  | 1031               | 272                | 0.47569              |
| 35-39                  | 40-44                  | 739                | 272                | 0.27851              |

**Supplementary Table S4: Pairwise comparison of luteal phase length between age groups.** Two-sided t-tests were performed to assess the significance of differences in luteal phase length across all age groups. The associated p-values are presented.

| Cycle Day | Follicular |                 |                 | n   | Luteal          |                  |
|-----------|------------|-----------------|-----------------|-----|-----------------|------------------|
|           | n          | LH<br>(mIU/L)   | PdG<br>(ng/mL)  |     | LH<br>(mIU/L)   | PdG<br>(ng/mL)   |
| 10        | 100        | $5.31 \pm 1.22$ | $2.68 \pm 0.40$ |     |                 |                  |
| 11        | 115        | $3.71 \pm 0.54$ | $2.64 \pm 0.27$ |     |                 |                  |
| 12        | 142        | $5.23 \pm 0.99$ | $3.31 \pm 0.37$ |     |                 |                  |
| 13        | 132        | $5.00 \pm 0.57$ | $2.69 \pm 0.30$ |     |                 |                  |
| 14        | 124        | $5.83 \pm 1.17$ | $3.19 \pm 0.39$ |     |                 |                  |
| 15        | 113        | $6.46 \pm 1.31$ | $3.28 \pm 0.42$ |     |                 |                  |
| 17        |            |                 |                 | 101 | $7.82 \pm 1.00$ | $8.52 \pm 0.74$  |
| 18        |            |                 |                 | 116 | $7.19 \pm 0.86$ | $8.86 \pm 0.68$  |
| 19        |            |                 |                 | 119 | $6.73 \pm 1.09$ | $9.10 \pm 0.69$  |
| 20        |            |                 |                 | 127 | $6.71 \pm 0.73$ | $11.08 \pm 0.70$ |
| 21        |            |                 |                 | 121 | $5.58 \pm 0.73$ | $10.54 \pm 0.69$ |
| 22        |            |                 |                 | 121 | $4.69 \pm 0.62$ | $11.34 \pm 0.66$ |
| 23        |            |                 |                 | 119 | $4.21 \pm 0.52$ | $10.97 \pm 0.57$ |

**Supplementary Table S5: The average LH and PdG levels for each day of the cycle for the 25-29 age group.** This table only includes data points with at least 100 samples. Any data point with less than 100 samples was excluded to prevent any potential misinterpretation.

| Cycle Day | Follicular |                 |                 | n | Luteal        |                |
|-----------|------------|-----------------|-----------------|---|---------------|----------------|
|           | n          | LH<br>(mIU/L)   | PdG<br>(ng/mL)  |   | LH<br>(mIU/L) | PdG<br>(ng/mL) |
| 9         | 205        | $4.26 \pm 0.47$ | $2.13 \pm 0.19$ |   |               |                |
| 10        | 325        | $3.94 \pm 0.34$ | $2.19 \pm 0.15$ |   |               |                |
| 11        | 371        | $5.45 \pm 0.48$ | $2.09 \pm 0.14$ |   |               |                |

|    |     |             |             |     |              |              |
|----|-----|-------------|-------------|-----|--------------|--------------|
| 12 | 388 | 5.90 ± 0.45 | 2.20 ± 0.16 |     |              |              |
| 13 | 349 | 6.99 ± 0.57 | 2.10 ± 0.14 | 121 | 12.99 ± 1.15 | 5.83 ± 0.50  |
| 14 | 291 | 6.91 ± 0.60 | 2.37 ± 0.18 | 197 | 12.33 ± 0.94 | 6.56 ± 0.46  |
| 15 | 224 | 7.19 ± 0.69 | 2.25 ± 0.20 | 264 | 11.14 ± 0.92 | 7.39 ± 0.40  |
| 16 | 176 | 8.00 ± 0.83 | 2.56 ± 0.26 | 310 | 9.33 ± 0.68  | 8.34 ± 0.41  |
| 17 | 126 | 9.15 ± 1.34 | 3.12 ± 0.38 | 348 | 7.50 ± 0.53  | 8.98 ± 0.39  |
| 18 |     |             |             | 382 | 6.93 ± 0.50  | 10.07 ± 0.38 |
| 19 |     |             |             | 378 | 6.03 ± 0.42  | 10.45 ± 0.39 |
| 20 |     |             |             | 388 | 4.70 ± 0.37  | 11.58 ± 0.38 |
| 21 |     |             |             | 367 | 4.18 ± 0.39  | 11.84 ± 0.40 |
| 22 |     |             |             | 350 | 3.67 ± 0.33  | 12.02 ± 0.40 |
| 23 |     |             |             | 309 | 4.20 ± 0.44  | 11.22 ± 0.44 |
| 24 |     |             |             | 231 | 4.56 ± 0.69  | 12.36 ± 0.51 |
| 25 |     |             |             | 160 | 4.30 ± 0.61  | 11.30 ± 0.61 |
| 26 |     |             |             | 115 | 4.79 ± 0.76  | 11.33 ± 0.72 |

**Supplementary Table S6: The average LH and PdG levels for each day of the cycle for the 35-39 age group.** This table only includes data points with at least 100 samples. Any data point with less than 100 samples was excluded to prevent any potential misinterpretation.

| Cycle Day | Follicular |               |                | n   | Luteal        |                |
|-----------|------------|---------------|----------------|-----|---------------|----------------|
|           | n          | LH<br>(mIU/L) | PdG<br>(ng/mL) |     | LH<br>(mIU/L) | PdG<br>(ng/mL) |
| 10        | 128        | 4.34 ± 0.64   | 1.71 ± 0.21    |     |               |                |
| 11        | 156        | 5.58 ± 0.72   | 1.71 ± 0.19    |     |               |                |
| 12        | 146        | 7.18 ± 0.79   | 1.77 ± 0.19    |     |               |                |
| 13        | 120        | 8.97 ± 1.14   | 2.09 ± 0.28    |     |               |                |
| 15        |            |               |                | 121 | 12.03 ± 0.99  | 7.51 ± 0.63    |
| 16        |            |               |                | 144 | 9.08 ± 0.88   | 8.05 ± 0.56    |
| 17        |            |               |                | 143 | 8.57 ± 0.90   | 9.38 ± 0.58    |
| 18        |            |               |                | 143 | 5.75 ± 0.67   | 11.30 ± 0.62   |
| 19        |            |               |                | 144 | 5.32 ± 0.64   | 12.02 ± 0.61   |
| 20        |            |               |                | 140 | 4.91 ± 0.69   | 13.55 ± 0.61   |
| 21        |            |               |                | 123 | 4.77 ± 0.65   | 12.34 ± 0.65   |
| 22        |            |               |                | 125 | 5.15 ± 0.65   | 12.31 ± 0.63   |
| 23        |            |               |                | 115 | 4.46 ± 0.64   | 12.18 ± 0.70   |

**Supplementary Table S7: The average LH and PdG levels for each day of the cycle for the 40-44 age group.** This table only includes data points with at least 100 samples. Any data point with less than 100 samples was excluded to prevent any potential misinterpretation.
